# Supplementary material for: K-bis(2-ethylhexyl) phosphate (BEHPK): a novel additive for C–H arylation
Source: Royal Society of Chemistry journal article supplement (doi:10.1039/c4ra03679d), 2014-01-01
Supplement: c4ra03679d1.pdf [file c4ra03679d1.pdf]

# **K-bis(2-ethylhexyl) phosphate (BEHPK): a novel additive for C-H arylation**

**Masahiko Seki**

*Process R&D Department  
Healthcare Business Division II  
API Corporation*

2-3-4, Nihonbashi, Chuo-ku  
Tokyo 103-0027, Japan  
e-mail: [seki.masahiko@mm.api-corp.co.jp](mailto:seki.masahiko@mm.api-corp.co.jp)

***Supporting Information***

## Experimental

**General:** Melting points are uncorrected.  $^1\text{H}$  and  $^{13}\text{C}$  NMR spectra (400 and 100 MHz, respectively) were recorded with tetramethylsilane used as an internal standard. Silica gel column chromatography was performed using Kieselgel 60 (E. Merck). Thin-layer chromatography (TLC) was carried out on E. Merck 0.25 mm pre-coated glass-backed plates (60 F<sub>254</sub>). Development was accomplished using 5% phosphomolybdic acid in ethanol-heat or visualized by UV light where feasible. All solvents and reagents were used as received.

**A typical procedure for C-H arylation using BEHPK: synthesis of {2'-[1-benzyl-1*H*-tetrazol-5-yl]biphenyl-4-yl}methyl acetate **3** and [{3'-(4-acetoxymethylphenyl)-2'-[1-benzyl-1*H*-tetrazol-5-yl]biphenyl-4-yl}methyl acetate **4**.**

Into 50 mL two neck flask were sequentially added 1-benzyl-5-phenyl-1*H*-tetrazole (**1**) (2.0 g, 8.46 mmol), 4-bromobenzyl acetate (**2**) (2.13 g, 9.31 mmol), PPh<sub>3</sub> (44 mg, 0.168 mmol), K<sub>2</sub>CO<sub>3</sub> (1.17 g, 8.46 mmol), 2.5% NMP solution of BEHPK (0.0608 g/2.44 mL, 0.168 mmol) and NMP (10 mL) at 25 °C under N<sub>2</sub> atmosphere. Reaction mixture was heated to 138°C and [RuCl<sub>2</sub>(*p*-cymene)]<sub>2</sub> (26 g, 0.0423 mmol) was added in one portion under stirring. Reaction was continued at 138°C for 6 h. Reaction mixture was cooled to 25°C prior to the addition of MTBE (20 mL) and stirred for 10 minutes. Filtered reaction mixture through sintered funnel and residue washed with MTBE (20 mL). Combined the organic layers, submitted sample for HPLC assay analysis. The organic layers were combined and washed with water (2 x 10 mL). Separated aqueous

layer was extracted with MTBE (2 x 10 mL). Combined organic layers were washed with water (2 x 20 mL), brine (1 x 20 mL), dried over Na<sub>2</sub>SO<sub>4</sub> and filtered. The filtrate was submitted to HPLC analysis (**3**: 2.83 g, 87%; **4**: 206 mg, 4.68%) and evaporated under reduced pressure. The residue was purified by silica gel column chromatography (hexane/AcOEt = 4:1) to provide monoarylation product **3** (2.67 g, 82%) and diarylation product **4** (45.1 mg, 1%). HPLC conditions: Cadenza CD-C-18 (4.6X 150) mm, 3 μ; M.P.A – buffer (0.03M KH<sub>2</sub>PO<sub>4</sub>) : acetonitrile (95:5), M.P.B – Buffer (0.03M KH<sub>2</sub>PO<sub>4</sub>) : acetonitrile (40:60), isocratic, A/B = 10:90; 1.0 mL/min; 225 nm, Inj vol - 10μL, column oven temp: 40 °C, sample conc.: 1000 ppm in diluent (acetonitrile). Compound **3**: mp: 73.4°C. IR (neat): 1741, 1603 cm<sup>-1</sup>. <sup>1</sup>H-NMR (CDCl<sub>3</sub>): δ = 7.63 (td, *J* = 7.6, 1.4 Hz, 1H), 7.57 (dd, *J* = 7.6, 1.4 Hz, 1H), 7.44 (td, *J* = 7.6, 1.4 Hz), 7.34 (dd, *J* = 7.6, 1.4 Hz, 1H), 7.27 (d, *J* = 8.6 Hz, 2H), 7.22 (t, *J* = 8.6 Hz, 1H), 7.16 (t, *J* = 8.6 Hz, 2H), 7.13 (d, *J* = 7.2 Hz, 2H), 6.76 (d, *J* = 7.2 Hz, 2H), 5.09 (s, 2H), 4.82 (s, 2H), 2.11 (s, 3H). <sup>13</sup>C-NMR (CDCl<sub>3</sub>): δ = 170.7, 154.5, 141.2, 138.6, 135.9, 133.0, 131.6, 131.3, 130.3, 129.2, 129.1, 128.6, 128.0, 122.6, 65.5, 51.3, 21.0. Mass: 385 [M + H]<sup>+</sup>. HRMS: Calcd for C<sub>23</sub>H<sub>20</sub>N<sub>4</sub>O<sub>2</sub>: 407.1484 [M + Na]<sup>+</sup>. Found: 407.1482 [M + Na]<sup>+</sup>. Compound **4**: mp: 155.3 °C; IR (KBr): *v*<sub>max</sub> = 1740, 1730, 1252, 1226 cm<sup>-1</sup>; <sup>1</sup>H NMR (CDCl<sub>3</sub>): δ = 7.70 (t, *J* = 7.6 Hz, 1H), 7.49 (d, *J* = 7.6 Hz, 2H), 7.26-7.22 (m, 1H), 7.17-7.12 (m, 6H), 6.96 (d, *J* = 8.0 Hz, 4H), 6.68 (d, *J* = 7.2 Hz, 2H), 5.03 (s, 4H), 4.73 (s, 2H), 2.10 (s, 6H); <sup>13</sup>C-NMR (CDCl<sub>3</sub>): δ = 170.8, 152.9, 143.1, 138.8, 135.6, 132.6, 131.4, 129.7, 129.1, 128.8, 128.7, 128.2, 128.1, 121.3, 65.7, 50.8, 21.0; HRMS: [M + Na]<sup>+</sup> calcd for C<sub>32</sub>H<sub>28</sub>N<sub>4</sub>O<sub>4</sub>Na 555.2008, found 555.2009; Mass: [M + Na]<sup>+</sup>: 555.2.

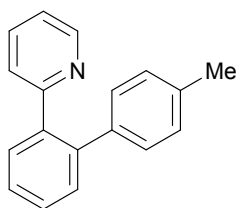

IR (KBr):  $\nu_{\max}$  = 3054, 3021, 2922, 2858, 1584, 1556, 1486, 1460, 1424, 1150, 795, 740  $\text{cm}^{-1}$ ;  $^1\text{H}$  NMR (DMSO- $d_6$ ):  $\delta$  = 8.63 (d,  $J$  = 4.0 Hz, 1H), 7.69-7.67 (m, 1H), 7.46-7.37 (m, 4H), 7.11-7.04 (m, 5H), 6.89 (d,  $J$  = 7.6 Hz, 1H), 2.31 (s, 3H);  $^{13}\text{C}$ -NMR: (DMSO- $d_6$ )  $\delta$  = 159.3, 149.3, 140.5, 139.3, 138.3, 136.3, 135.1, 130.4, 129.5, 128.7, 128.4, 127.3, 125.3, 121.2, 21.1; Mass:  $[\text{M} + \text{H}]^+$ : 246.<sup>1</sup>

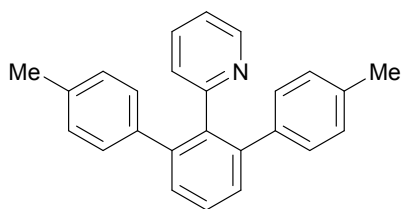

mp: 154.2 °C; IR (KBr):  $\nu_{\max}$  = 3023, 2993, 2918, 1583, 1560, 1512, 1451, 1419, 817, 799, 744  $\text{cm}^{-1}$ ;  $^1\text{H}$  NMR (DMSO- $d_6$ ):  $\delta$  = 8.33 (d,  $J$  = 4.4 Hz, 1H), 7.50-7.46 (m, 1H), 7.41 (d,  $J$  = 7.2 Hz, 2H), 7.33-7.25 (m, 1H), 7.04-6.87 (m, 10H), 2.26 (s, 6H);  $^{13}\text{C}$ -NMR (DMSO- $d_6$ ):  $\delta$  = 159.2, 148.4, 141.7, 138.6, 138.4, 135.7, 134.8, 133.4, 129.3, 128.3, 128.0, 126.7, 120.7, 21.0; Mass:  $[\text{M} + \text{H}]^+$ : 336.<sup>1</sup>

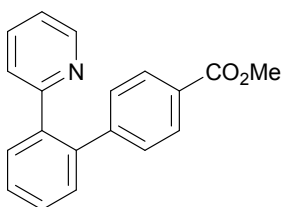

mp: 130.9 °C; IR (KBr):  $\nu_{\max}$  = 2951, 2924, 1723, 1707, 1275, 1110, 760, 704  $\text{cm}^{-1}$ ;  $^1\text{H}$  NMR ( $\text{DMSO-}d_6$ ):  $\delta$  = 8.52 (d,  $J$  = 4.0 Hz, 1H), 7.83 (d,  $J$  = 8.4 Hz, 2H), 7.63-7.60 (m, 2H), 7.55 (t,  $J$  = 3.6 Hz, 2H), 7.48 (d,  $J$  = 3.2 Hz, 1H), 7.24 (t,  $J$  = 8.4 Hz, 3H), 7.04 (d,  $J$  = 8.0 Hz, 1H), 3.84 (s, 3H);  $^{13}\text{C}$ -NMR ( $\text{DMSO-}d_6$ ):  $\delta$  = 166.0, 158.2, 149.2, 145.2, 139.4, 139.1, 135.9, 130.5, 130.2, 129.6, 128.9, 128.6, 128.1, 127.8, 124.7, 121.9, 52.1; Mass:  $[\text{M} + \text{H}]^+$ : 290.<sup>1</sup>

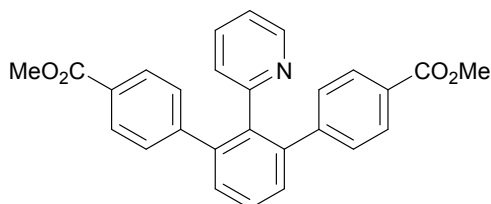

mp: 196.5 °C; IR (KBr):  $\nu_{\max}$  = 2948, 1715, 1285, 1102, 768, 706  $\text{cm}^{-1}$ ;  $^1\text{H}$  NMR ( $\text{DMSO-}d_6$ ):  $\delta$  = 8.35 (d,  $J$  = 4.0 Hz, 1H), 7.75 (d,  $J$  = 8.4 Hz, 4H), 7.66 (t,  $J$  = 7.6 Hz, 1H), 7.53 (d,  $J$  = 7.6 Hz, 2H), 7.45 (t,  $J$  = 7.6 Hz, 1H), 7.18 (d,  $J$  = 8.0 Hz, 4H), 7.07 (t,  $J$  = 7.6 Hz, 1H), 6.94 (d,  $J$  = 7.6 Hz, 1H), 3.81 (s, 6H);  $^{13}\text{C}$ -NMR ( $\text{DMSO-}d_6$ ):  $\delta$  = 166.0, 157.4, 148.5, 145.9, 140.4, 138.4, 135.4, 129.7, 128.6, 128.5, 127.6, 126.6, 121.7, 52.1; Mass:  $[\text{M} + \text{H}]^+$ : 424.<sup>1</sup>

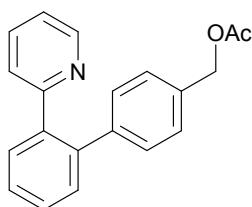

IR (KBr):  $\nu_{\max}$  = 1738, 1585, 1462, 1231  $\text{cm}^{-1}$ ;  $^1\text{H}$  NMR ( $\text{CDCl}_3$ ):  $\delta$  = 8.63 (dt,  $J$  = 4.8, 0.8 Hz, 1H), 7.70-7.66 (m, 1H), 7.49-7.45 (m, 2H), 7.44-7.38 (m, 2H), 7.25 (d,  $J$  = 8.0 Hz, 2H), 7.16 (d,  $J$  = 6.8 Hz, 2H), 7.14-7.09 (m, 1H), 6.90 (d,  $J$  = 7.6 Hz, 1H), 5.08 (s,

2H), 2.10 (s, 3H);  $^{13}\text{C}$ -NMR ( $\text{CDCl}_3$ ):  $\delta = 170.7, 159.0, 149.3, 141.1, 139.9, 139.3, 135.2, 134.2, 130.3, 129.7, 128.4, 127.7, 127.6, 125.2, 121.3, 65.8, 20.8$ ; HRMS:  $[\text{M}+\text{Na}]^+$  calcd for  $\text{C}_{20}\text{H}_{17}\text{NO}_2\text{Na}$  326.1157, found 326.1152; Mass:  $[\text{M} + \text{H}]^+$ : 304.

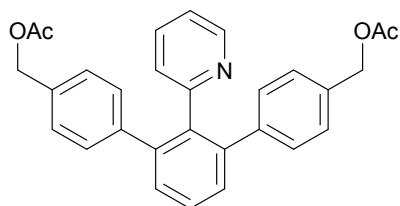

mp: 192 °C; IR (KBr):  $\nu_{\text{max}} = 1729, 1241 \text{ cm}^{-1}$ ;  $^1\text{H}$  NMR ( $\text{CDCl}_3$ ):  $\delta = 8.33\text{-}8.32$  (m, 1H), 7.55-7.50 (m, 1H), 7.43 (d,  $J = 8.0 \text{ Hz}$ , 2H), 7.32 (dt,  $J = 7.2, 0.8 \text{ Hz}$ , 1H), 7.14 (d,  $J = 8.0 \text{ Hz}$ , 4H), 7.09 (d,  $J = 8.0 \text{ Hz}$ , 4H), 6.96-6.92 (m, 1H), 6.88 (d,  $J = 7.6 \text{ Hz}$ , 1H), 5.03 (s, 4H), 2.08 (s, 6H);  $^{13}\text{C}$ -NMR ( $\text{CDCl}_3$ ):  $\delta = 170.8, 158.7, 148.6, 141.5, 141.4, 138.4, 135.0, 133.9, 129.8, 129.6, 128.3, 127.5, 126.7, 121.1, 66.0, 21.0$ ; HRMS:  $[\text{M} + \text{H}]^+$  calcd for  $\text{C}_{29}\text{H}_{26}\text{NO}_4$  452.1862, found 452.1865; Mass:  $[\text{M} + \text{H}]^+$ : 452.0.

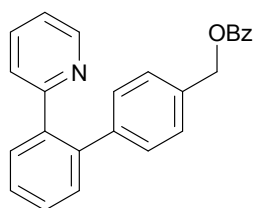

IR (KBr):  $\nu_{\text{max}} = 3419, 3059, 3030, 3008, 2954, 1918, 1718, 1584, 1461, 1269, 1107, 757 \text{ cm}^{-1}$ ;  $^1\text{H}$  NMR ( $\text{DMSO-}d_6$ ):  $\delta = 8.55$  (d,  $J = 4.0 \text{ Hz}$ , 1H), 7.99 (d,  $J = 7.6 \text{ Hz}$ , 2H), 7.67 (t,  $J = 7.2 \text{ Hz}$ , 1H), 7.60-7.43 (m, 7H), 7.35 (d,  $J = 7.6 \text{ Hz}$ , 2H), 7.23 (t,  $J = 5.6 \text{ Hz}$ , 1H), 7.12 (d,  $J = 8.0 \text{ Hz}$ , 2H), 7.0 (d,  $J = 8.0 \text{ Hz}$ , 1H), 5.33 (s, 2H);  $^{13}\text{C}$ -NMR ( $\text{DMSO-}d_6$ ):  $\delta = 165.5, 158.6, 149.2, 140.7, 139.6, 139.3, 135.7, 134.5, 133.4, 130.4, 130.3,$

129.5, 129.4, 129.2, 128.8, 128.5, 127.6, 127.5, 124.7, 121.7, 65.8; HRMS:  $[M + H]^+$  calcd for  $C_{25}H_{20}O_2N$  366.1494, found 366.1491; Mass:  $[M + H]^+$ : 366.

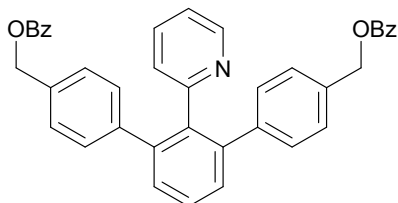

mp: 159.4 °C; IR (KBr):  $\nu_{\max} = 3059, 3027, 2932, 1723, 1449, 1267, 1109, 709 \text{ cm}^{-1}$ ;  $^1\text{H}$  NMR (DMSO- $d_6$ ):  $\delta = 8.31$  (d,  $J = 4.0$  Hz, 1H), 7.98 (d,  $J = 7.6$  Hz, 4H), 7.68-7.65 (m, 1H), 7.61-7.51 (m, 6H), 7.45-7.42 (m, 3H), 7.27 (d,  $J = 7.6$  Hz, 4H), 7.10-7.02 (m, 5H), 6.96 (d,  $J = 7.6$  Hz, 1 H), 5.23 (s, 4H);  $^{13}\text{C}$ -NMR (DMSO- $d_6$ ):  $\delta = 165.5, 158.1, 148.3, 140.9, 138.4, 135.2, 134.1, 133.4, 129.5, 129.4, 129.3, 129.2, 128.8, 128.3, 127.2, 126.5, 121.4, 65.8$ ; HRMS:  $[M + H]^+$  calcd for  $C_{39}H_{30}O_4N$  576.2175, found 576.2170; Mass:  $[M + H]^+$ : 576.

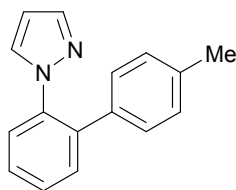

IR (KBr):  $\nu_{\max} = 3025, 2921, 1517, 1393, 1044, 937, 820, 703 \text{ cm}^{-1}$ ;  $^1\text{H}$  NMR (DMSO- $d_6$ ):  $\delta = 7.70$  (s, 1H), 7.60 - 7.48 (m, 4H), 7.44 (d,  $J = 2.0$  Hz, 1H), 7.09 (d,  $J = 7.6$  Hz, 2 H), 6.93 (d,  $J = 8.0$  Hz, 2H), 6.29 (s, 1H), 2.27 (s, 3H);  $^{13}\text{C}$ -NMR (DMSO- $d_6$ ):  $\delta = 139.9, 138.2, 136.6, 136.5, 135.3, 131.6, 130.8, 128.9, 128.5, 128.1, 128.0, 126.7, 106.5, 20.6$ ; Mass:  $[M + H]^+$ : 235.<sup>2</sup>

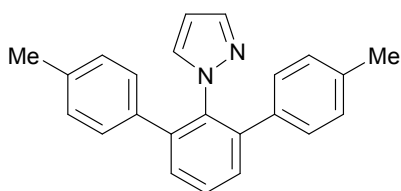

mp: 110.4 °C; IR (KBr):  $\nu_{\max}$  = 1517, 1456, 1048  $\text{cm}^{-1}$ ;  $^1\text{H}$  NMR ( $\text{CDCl}_3$ ):  $\delta$  = 7.53 (t,  $J$  = 6.8 Hz, 1H), 7.47 - 7.40 (m, 3H), 7.09 (d,  $J$  = 4.0 Hz, 1H), 7.05-6.98 (m, 8 H) 6.08 (t,  $J$  = 2.0 Hz, 1H), 2.305 (s, 6H);  $^{13}\text{C}$ -NMR ( $\text{CDCl}_3$ ):  $\delta$  = 140.3, 139.2, 136.8, 136.3, 135.8, 132.4, 129.8, 129.0, 128.7, 128.0, 105.9, 21.1; HRMS:  $[\text{M} + \text{Na}]^+$  calcd for  $\text{C}_{23}\text{H}_{20}\text{N}_2\text{Na}$  347.1524, found 347.1521; Mass:  $[\text{M} + \text{H}]^+$  : 325.

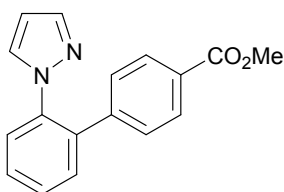

mp: 113.0 °C; IR (KBr):  $\nu_{\max}$  = 1723, 1281, 1116, 760, 706  $\text{cm}^{-1}$ ;  $^1\text{H}$  NMR ( $\text{DMSO}-d_6$ ):  $\delta$  = 7.85 (d,  $J$  = 8.4 Hz, 2H), 7.58 (t,  $J$  = 4.4, 6H), 7.17 (d,  $J$  = 8.0 Hz, 2H), 6.32 (s, 1H), 3.84 (s, 3H);  $^{13}\text{C}$ -NMR ( $\text{DMSO}-d_6$ ):  $\delta$  = 165.9, 134.2, 140.2, 138.3, 135.6, 130.8, 129.2, 129.05, 128.73, 128.5, 128.4, 126.7, 106.7, 52.11; Mass:  $[\text{M} + \text{H}]^+$ : 279.<sup>1</sup>

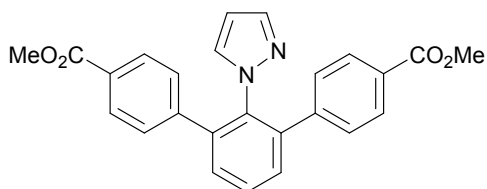

mp: 199.6 °C; IR (KBr):  $\nu_{\max}$  = 1717, 1275, 1102, 768, 706  $\text{cm}^{-1}$ ;  $^1\text{H}$  NMR ( $\text{DMSO}-d_6$ ):  $\delta$  = .81 (d,  $J$  = 8.0 Hz, 4H), 7.75 (t,  $J$  = 8.0 Hz, 1H), 7.65 (d,  $J$  = 7.6 Hz, 2H), 7.49 (s, 1H), 7.37 (s, 1H), 7.21 (d,  $J$  = 8.0, 4H), 6.13 (s, 1H), 3.83 (s, 6H);  $^{13}\text{C}$ -NMR ( $\text{DMSO}-$



*d*<sub>6</sub>):  $\delta = 165.9, 142.9, 139.5, 138.9, 136.1, 133.4, 130.5, 129.7, 128.8, 128.4, 128.3, 106.4, 52.1$ ; Mass:  $[M + H]^+$  : 413.<sup>1</sup>

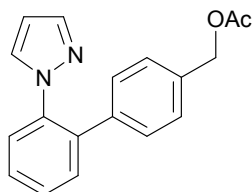

IR (KBr):  $\nu_{\max} = 1918, 1734, 1249 \text{ cm}^{-1}$ ;  $^1\text{H NMR}$  ( $\text{CDCl}_3$ ):  $\delta = 7.63$  (d,  $J = 1.6 \text{ Hz}$ , 1H), 7.60 (dt,  $J = 8.4, 4.1, 1.2 \text{ Hz}$ , 1H), 7.48 - 7.45 (m, 3H), 7.27 (d,  $J = 7.2 \text{ Hz}$ , 2H), 7.10 (dd,  $J = 5.6, 2.4 \text{ Hz}$ , 3H), 6.21 (t,  $J = 2.4 \text{ Hz}$ , 1H), 5.09 (s, 2H), 2.11 (s, 3H);  $^{13}\text{C-NMR}$  ( $\text{CDCl}_3$ ):  $\delta = 170.7, 140.2, 138.4, 138.3, 136.1, 135.0, 131.2, 130.9, 128.6, 128.4, 128.2, 128.1, 127.7, 126.6, 106.4, 65.7, 20.9$ ; HRMS:  $[M + \text{Na}]^+$  calcd for  $\text{C}_{18}\text{H}_{16}\text{O}_2\text{N}_2\text{Na}$  315.1109, found 315.1114; Mass:  $[M + \text{Na}]^+$  : 314.

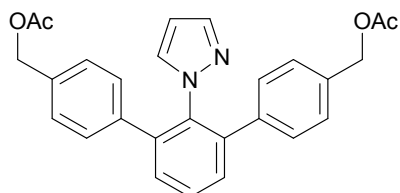

mp: 162.8 °C; IR (KBr):  $\nu_{\max} = 1729, 1243 \text{ cm}^{-1}$ ;  $^1\text{H NMR}$  ( $\text{CDCl}_3$ ):  $\delta = 7.57$  (t,  $J = 6.8 \text{ Hz}$ , 1H), 7.48 (d,  $J = 7.2 \text{ Hz}$ , 2H), 7.39 (d,  $J = 1.6 \text{ Hz}$ , 1H), 7.22 (d,  $J = 8.0 \text{ Hz}$ , 4H), 7.11-7.07 (m, 5H), 6.08 (t,  $J = 2.0$ , 1H), 5.07 (s, 4H), 2.10 (s, 6H);  $^{13}\text{C-NMR}$  ( $\text{CDCl}_3$ ):  $\delta = 170.7, 140.2, 139.8, 139.4, 138.4, 136.2, 134.8, 132.3, 130.1, 129.1, 128.5, 128.2, 128.3, 127.7, 106.1, 65.7, 20.8$ ; HRMS:  $[M + \text{Na}]^+$  calcd for  $\text{C}_{27}\text{H}_{24}\text{O}_4\text{N}_2\text{Na}$  463.1634, found 463.1636; Mass:  $[M + H]^+$ : 441.2.

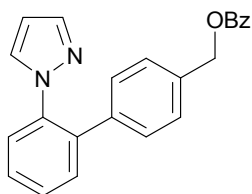

mp = 103.4 °C; IR (KBr):  $\nu_{\max}$  = 3114, 1713, 1275, 1106, 706  $\text{cm}^{-1}$ ;  $^1\text{H}$  NMR (DMSO- $d_6$ ):  $\delta$  = 8.01 (d,  $J$  = 7.2 Hz, 2H), 7.68 (t,  $J$  = 7.2 Hz, 1H), 7.60 - 7.55 (m, 8H), 7.39 (d,  $J$  = 7.6 Hz, 2H), 7.08 (d,  $J$  = 8.0 Hz, 2H), 6.31 (s, 1H), 5.34 (s, 2H);  $^{13}\text{C}$ -NMR (DMSO- $d_6$ ):  $\delta$  = 165.6, 140.1, 138.2, 138.0, 136.2, 135.2, 133.4, 131.7, 131.0, 129.5, 129.2, 128.8, 128.7, 128.5, 128.3, 127.8, 126.8, 106.6, 65.8; HRMS:  $[\text{M} + \text{Na}]^+$  calcd for  $\text{C}_{23}\text{H}_{18}\text{O}_2\text{N}_2\text{Na}$  377.1266, found 377.1271; Mass:  $[\text{M} + \text{H}]^+$ : 355.

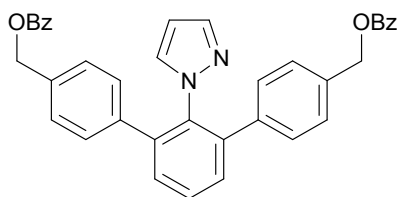

mp: 122.4 °C; IR (KBr):  $\nu_{\max}$  = 2933, 1721, 1267, 1177, 706  $\text{cm}^{-1}$ ;  $^1\text{H}$  NMR (DMSO- $d_6$ ):  $\delta$  = 8.01 (d,  $J$  = 7.6 Hz, 4H), 7.68 (t,  $J$  = 6.8 Hz, 3H), 7.56-7.51 (m, 7H), 7.38-7.33 (m, 5H), 7.12 (d,  $J$  = 8.0 Hz, 4H), 6.12 (s, 1H), 5.32 (s, 4H);  $^{13}\text{C}$ -NMR (DMSO- $d_6$ ):  $\delta$  = 165.6, 139.6, 139.3, 138.1, 136.1, 135.0, 133.4, 130.2, 129.5, 129.2, 128.8, 128.2, 127.5, 106.2, 65.8; HRMS:  $[\text{M} + \text{Na}]^+$  calcd for  $\text{C}_{37}\text{H}_{28}\text{O}_4\text{N}_2\text{Na}$  587.1947, found 587.1948; Mass:  $[\text{M} + \text{H}]^+$ : 565.

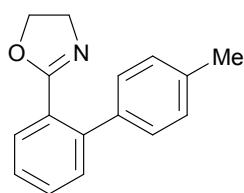

IR (KBr):  $\nu_{\max}$  = 3057, 2967, 2877, 1649, 1478, 1236, 1078, 1038, 940, 759  $\text{cm}^{-1}$ ;  $^1\text{H}$  NMR (DMSO- $d_6$ ):  $\delta$  = 7.66 (d,  $J$  = 7.2 Hz, 1H), 7.55 (d,  $J$  = 7.6 Hz, 1H), 7.44-7.39 (m, 2H), 7.21 (s, 4H), 4.09 (t,  $J$  = 9.6 Hz, 2H), 3.78 (t,  $J$  = 9.6 Hz, 2H), 2.36 (s, 3H);  $^{13}\text{C}$ -NMR (DMSO- $d_6$ ):  $\delta$  = 164.5, 140.9, 137.6, 136.4, 130.6, 130.1, 129.9, 128.7, 127.9, 127.4, 126.9, 67.3, 54.6, 20.7; HRMS:  $[\text{M} + \text{H}]^+$  calcd for  $\text{C}_{16}\text{H}_{16}\text{ON}$  238.1232, found 238.1233; Mass:  $[\text{M} + \text{H}]^+$ : 238.

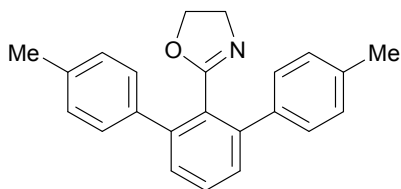

mp: 151.1°C; IR (KBr):  $\nu_{\max}$  = 3052, 2899, 2873, 1668, 1243, 1099, 1038, 820, 795, 760, 704  $\text{cm}^{-1}$ ;  $^1\text{H}$  NMR (DMSO- $d_6$ ):  $\delta$  = 7.59 (t,  $J$  = 7.6 Hz, 1H), 7.38 (d,  $J$  = 7.6 Hz, 2H), 7.29 (d,  $J$  = 7.6 Hz, 4H), 7.22 (d,  $J$  = 8.0 Hz, 4H), 3.91 (t,  $J$  = 9.2 Hz, 2H), 3.50 (t,  $J$  = 9.2 Hz, 2H), 2.33 (s, 6H);  $^{13}\text{C}$ -NMR (DMSO- $d_6$ ):  $\delta$  = 162.7, 141.5, 137.4, 136.5, 129.9, 128.7, 128.6, 128.1, 127.0, 66.8, 54.6, 20.7; HRMS:  $[\text{M} + \text{H}]^+$  calcd for  $\text{C}_{23}\text{H}_{22}\text{ON}$  328.1701, found 328.1700; Mass:  $[\text{M} + \text{H}]^+$ : 328.

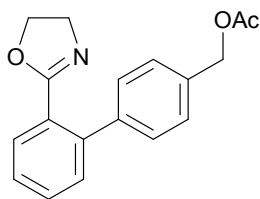

IR (KBr):  $\nu_{\max}$  = 1735, 1648, 1226  $\text{cm}^{-1}$ ;  $^1\text{H}$  NMR ( $\text{CDCl}_3$ ):  $\delta$  = 7.77 (dd,  $J$  = 7.8, 1.2 Hz, 1H), 7.50 (dt,  $J$  = 7.6, 6.4 Hz, 1H), 7.41-7.36 (m, 6H), 5.15 (s, 2H), 4.14 (t,  $J$  = 9.2 Hz, 2H), 3.92 (t,  $J$  = 9.2 Hz, 2H), 2.13 (s, 3H);  $^{13}\text{C}$ -NMR ( $\text{CDCl}_3$ ):  $\delta$  = 170.8, 165.8, 141.2,

141.1, 134.7, 130.5, 130.3, 130.1, 128.4, 127.8, 127.4, 127.2, 67.7, 65.9, 54.9, 20.9;  
HRMS:  $[M+H]^+$  calcd for  $C_{18}H_{18}NO_3$  296.1286, found 296.1285 ; Mass:  $[M + H]^+$ : 296.

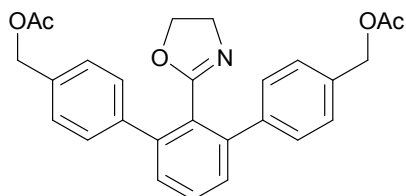

mp: 152.5°C; IR (KBr):  $\nu_{\max} = 1725, 1665, 1246 \text{ cm}^{-1}$ ;  $^1\text{H NMR}$  ( $\text{CDCl}_3$ ):  $\delta = 7.53$  (t,  $J = 7.2 \text{ Hz}$ , 1H), 7.45 (d,  $J = 6.4 \text{ Hz}$ , 4H), 7.38 (dd,  $J = 8.0, 3.2 \text{ Hz}$ , 6H), 5.15 (s, 4H), 3.91 (t,  $J = 9.6 \text{ Hz}$ , 2H), 3.61 (t,  $J = 9.6 \text{ Hz}$ , 2H), 2.13 (s, 6H);  $^{13}\text{C-NMR}$  ( $\text{CDCl}_3$ ):  $\delta = 170.8, 163.7, 141.8, 140.7, 134.9, 129.6, 128.9, 128.7, 127.8, 127.4, 67.3, 65.9, 55.01, 20.97$ ; HRMS:  $[M + H]^+$  calcd for  $C_{27}H_{26}O_5N$  444.1811, found 444.1810; Mass:  $[M + H]^+$  : 444.

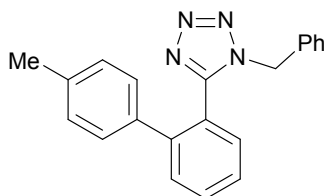

mp: 140 °C; IR (KBr):  $\nu_{\max} = 1455, 1093 \text{ cm}^{-1}$ ;  $^1\text{H NMR}$  ( $\text{CDCl}_3$ ):  $\delta = 7.61$  (dt,  $J = 8.0, 1.6 \text{ Hz}$ , 1H), 7.56 (dd,  $J = 7.8, 0.8 \text{ Hz}$ , 1H), 7.39 (dt,  $J = 7.8, 1.2 \text{ Hz}$ , 1H), 7.33 (dd,  $J = 7.8, 1.2 \text{ Hz}$ , 1H), 7.22-7.08 (m, 5H), 7.03 (d,  $J = 8.4 \text{ Hz}$ , 2H), 6.75 (d,  $J = 7.2 \text{ Hz}$ , 2H), 4.76 (s, 2H), 2.34 (s, 3H);  $^{13}\text{C-NMR}$  ( $\text{CDCl}_3$ ):  $\delta = 154.5, 141.4, 137.7, 135.6, 132.9, 131.3, 130.9, 129.9, 129.4, 128.4, 128.2, 127.6, 127.3, 122.3, 50.5, 20.8$ ; HRMS:  $[M + \text{Na}]^+$  calcd for  $C_{21}H_{18}N_4\text{Na}$  349.1429, found 349.1425; Mass:  $[M + H]^+$ : 327.

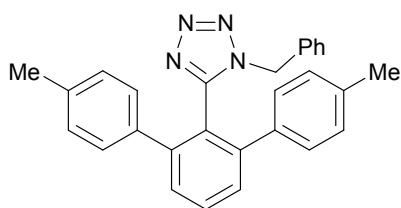

mp 183.5 °C; IR (KBr):  $\nu_{\max}$  = 3061, 3033, 2917, 2858, 1736, 1513, 1457, 1439, 1404, 1104, 798;  $^1\text{H}$  NMR ( $\text{CDCl}_3$ ):  $\delta$  = 7.65 (t,  $J$  = 7.6 Hz, 1H), 7.45 (d,  $J$  = 8.0 Hz, 2H), 7.28-7.20 (m, 1H), 7.13 (t,  $J$  = 8.0 Hz, 2H), 6.96 (d,  $J$  = 8.0 Hz, 4H), 6.84 (d,  $J$  = 8.0 Hz, 4H), 6.70 (d,  $J$  = 7.2 Hz, 2H), 4.71 (s, 2H), 2.24 (s, 6H);  $^{13}\text{C}$ -NMR ( $\text{CDCl}_3$ ):  $\delta$  = 153.1, 143.5, 137.4, 136.1, 132.7, 131.1, 129.2, 128.9, 128.7, 128.6, 128.5, 128.2, 121.2, 50.6, 21.0; HRMS:  $[\text{M} + \text{H}]^+$  calcd for  $\text{C}_{28}\text{H}_{24}\text{N}_4$  417.2079, found 417.2080; Mass:  $[\text{M} + \text{H}]^+$ : 417.

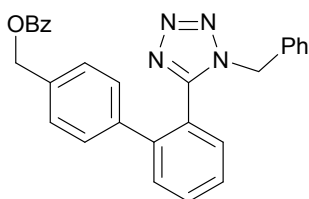

Mp: 105.6 °C; IR (KBr):  $\nu_{\max}$  = 3055, 3033, 2934, 2884, 1719, 1598, 1461, 1449, 1403, 1263, 1117, 1102, 775, 697  $\text{cm}^{-1}$ ;  $^1\text{H}$  NMR ( $\text{CDCl}_3$ ):  $\delta$  = 8.10 (d,  $J$  = 7.2 Hz, 2H), 7.66 - 7.56 (m, 3H), 7.48-7.35 (m, 6H), 7.26-7.12 (m, 5H), 6.76 (d,  $J$  = 7.2 Hz, 2H), 5.35 (s, 2H), 4.83 (s, 2H);  $^{13}\text{C}$ -NMR ( $\text{CDCl}_3$ ):  $\delta$  = 166.3, 154.5, 141.2, 138.6, 136.0, 133.1, 132.9, 131.6, 131.2, 130.3, 129.7, 128.8, 128.7, 128.5, 128.4, 127.9, 127.7, 122.6, 65.9, 50.8; HRMS:  $[\text{M} + \text{Na}]^+$  calcd for  $\text{C}_{28}\text{H}_{22}\text{N}_4\text{O}_2\text{Na}$  469.1640, found 467.1640; Mass:  $[\text{M} + \text{Na}]^+$ : 469.

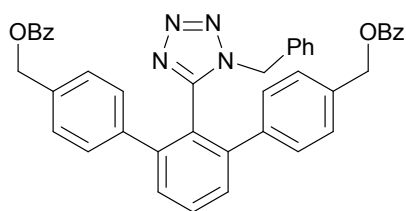

mp: 118.2 °C ; IR (KBr):  $\nu_{\text{max}}$  = 3061, 3034, 1717, 1451, 1378, 1315, 1271, 1109, 1102, 1070, ,1023, 800, 713, 689  $\text{cm}^{-1}$ ;  $^1\text{H}$  NMR ( $\text{CDCl}_3$ ):  $\delta$  = 8.07 (d,  $J$  = 7.6 Hz, 4H), 7.71 (t,  $J$  = 8 Hz, 5H), 7.57 (t,  $J$  = 7.2 Hz, 2H), 7.50 (d,  $J$  = 7.6 Hz, 2H), 7.45 (t,  $J$  = 7.6 Hz, 4H), 7.26 – 7.18 (m, 1H), 7.12 (t,  $J$  = 7.6 Hz, 2H), 7.00 (d,  $J$  = 8.0 Hz, 4H), 6.68 (d,  $J$  = 7.6 Hz, 2H), 5.30 (s, 4H), 4.74 (s, 2H);  $^{13}\text{C}$ -NMR ( $\text{CDCl}_3$ ):  $\delta$  = 166.2, 152.8, 143.0, 138.7, 135.6, 133.2, 133.0, 132.5, 131.7, 131.3, 129.9, 129.6, 129.1, 128.7, 128.6, 128.3, 128.0, 127.8, 123.9, 121.2, 65.93, 50.7; HRMS:  $[\text{M} + \text{Na}]^+$  calcd for  $\text{C}_{42}\text{H}_{32}\text{N}_4\text{O}_4\text{Na}$  679.2321, found 679.2321; Mass:  $[\text{M} + \text{H}]^+$ : 657.

## Reference

- (1) N. Luo and Z. Yu, *Chem Eur. J.*, 2010, **16**, 787.
- (2) D. Shabashov and O. Daugulis, *Org. Lett.*, 2005, **7**, 3657.
